# Supplementary material for: New Partners Identified by Mass Spectrometry Assay Reveal Functions of NCAM2 in Neural Cytoskeleton Organization
Source: MDPI journal article supplement (doi:10.3390/ijms22147404), 2021-07-09
Supplement: s1 [file s1]

## Supplementary Materials

**Figure S1: NCAM2 interacts with Actin.** (A) NCAM2.1 and Actin interaction detection by Western-blot after co-immunoprecipitation experiments from P10-P15 mouse cortex and hippocampal protein extracts. Actin was detected after NCAM2.1 immunoprecipitation. (B) Quantification of Actin signal detected in WBs from (A). \*\*\*\*  $p \leq 0.0001$ ; one-way ANOVA using Tukey comparison post-test.

**Table S1: NCAM2 interactome.** Proteins identified by LC-MS/MS in the NCAM2 immunoprecipitated samples obtained with False Discovery Rate  $\leq 0.01\%$ . The table shows the proteins, the number of different peptides (Ptd) and the coverage of these proteins.

**Table S2: Mass spectrometry results.** Proteins identified by LC-MS/MS in the NCAM2 immunoprecipitated samples obtained with False Discovery Rate  $\leq 0.01\%$  and detected with two or more peptides. The table shows the proteins detected with different peptides (Ppts) in the different experiments and with different antibodies. Proteins in red were detected using different antibodies (against extracellular domain of NCAM2 detecting both isoforms or against the intracellular domain of NCAM2.1); \* marks proteins found in two different and independent experiments. Seven proteins were detected with both criteria.

**Table S3: Gene Ontology (GO) terms enriched for Biological Process in the NCAM2 interactors.** The table shows the GO term identifier, the term description, the number of genes observed, the background gene camp, the False Discovery Rate, the list of the matching proteins in the network (IDs) and the list of the matching proteins in the network (labels).

**Table S4: Gene Ontology (GO) terms enriched in Molecular Function in the NCAM2's interactors.** The table shows the GO term identifier, the term description, the number of genes observed, the background gene camp, the False Discovery Rate, the list of the matching proteins in the network (IDs) and the list of the matching proteins in the network (labels).

**Table S5: Gene Ontology (GO) terms enriched in Cellular Components.** The table shows the GO term identifier, the term description, the number of genes observed, the background gene camp, the False Discovery Rate, the list of the matching proteins in the network (IDs) and the list of the matching proteins in the network (labels).

**Table S6: The Kyoto Encyclopedia of Genes and Genomes (KEGGS) pathways terms enriched.** The table presents the KEGGs identifier, the term description, the number of genes observed, the background gene camp, the False Discovery Rate, the list of the matching proteins in the network (IDs) and the list of the matching proteins in the network (labels).

**Table S7: The Reactome pathways enriched.** The table presents the Reactome pathways identifier, the term description, the number of genes observed, the background gene camp, the False Discovery Rate, the list of the matching proteins in the network (IDs) and the list of the matching proteins in the network (labels).

**A**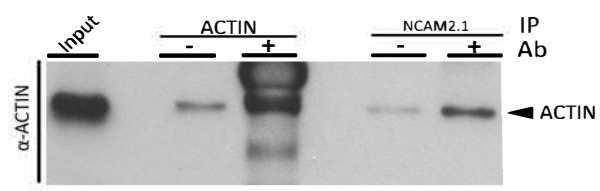**B**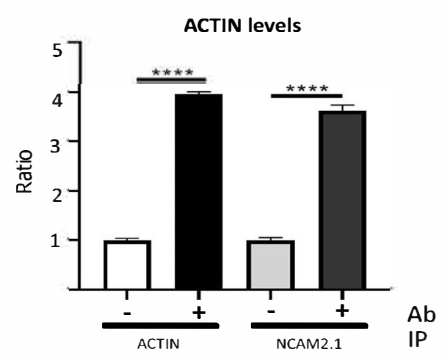

Supplementary Figure S1

| Protein (gene)                                                     | Ptd. | Coverage | Protein (gene)                                                               | Ptd. | Coverage |
|--------------------------------------------------------------------|------|----------|------------------------------------------------------------------------------|------|----------|
| Microtubule-associated protein 2 (Map2)                            | 24   | 21,50    | 60S acidic ribosomal protein P1 (Rplp1)                                      | 1    | 14,04    |
| Neurofilament light polypeptide (Nefl)                             | 20   | 42,36    | Adenomatous polyposis coli protein 2 (Apc2)                                  | 1    | 1,67     |
| Actin, cytoplasmic 1 (Actb)                                        | 19   | 67,47    | BRCA1-associated RING domain 1 (Bard1)                                       | 1    | 2,35     |
| Neurofilament medium polypeptide (Nefm)                            | 19   | 30,31    | Carnitine O-palmitoyltransferase 1 (Cpt1a)                                   | 1    | 2,72     |
| Tubulin beta-4A (Tubb4a)                                           | 18   | 60,59    | Cell cycle exit and neuronal differentiation protein 1 (Cend1)               | 1    | 10,74    |
| Alpha-internexin (Ina)                                             | 17   | 37,33    | Coiled-coil domain-containing 117 (Ccgc117)                                  | 1    | 13,72    |
| Tubulin alpha-1A (Tuba1a)                                          | 13   | 44,79    | Coiled-coil domain-containing 39 (Ccgc39)                                    | 1    | 1,49     |
| Tubulin alpha-1C (Tuba1c)                                          | 12   | 39,64    | Coiled-coil domain-containing 84 (Ccgc84)                                    | 1    | 1,81     |
| Actin, alpha cardiac muscle 1 (Actc1)                              | 11   | 31,56    | Collagen alpha-1(XIV) chain (Col14a1)                                        | 1    | 0,45     |
| Calcium/calmodulin-dependent protein kinase type II beta (Camk2b)  | 11   | 28,97    | Collectin-11 (Colec11)                                                       | 1    | 15,44    |
| Calcium/calmodulin-dependent protein kinase type II alpha (Camk2a) | 10   | 29,71    | Cytochrome c oxidase subunit NDUF4A (Ndufa4)                                 | 1    | 14,63    |
| Microtubule-associated protein 1B (Map1b)                          | 9    | 6,86     | Desmoglein-1-alpha (Dsg1a)                                                   | 1    | 1,23     |
| Beta-actin-like protein 2 (Actbl2)                                 | 8    | 27,39    | DNA helicase INO80 (Ino80)                                                   | 1    | 0,51     |
| F-actin-capping protein beta (Capzb)                               | 8    | 45,49    | Eukaryotic translation initiation factor 3F (Eif3f)                          | 1    | 5,26     |
| 14-3-3 protein zeta/delta (Ywhaz)                                  | 8    | 37,96    | Exportin-6 (Xpo6)                                                            | 1    | 1,78     |
| Tubulin beta-6 chain (Tubb6)                                       | 7    | 19,24    | Ferritin heavy chain (Fth1)                                                  | 1    | 3,85     |
| Calcium/calmodulin-dependent protein kinase type II delta (Camk2d) | 6    | 16,43    | Galactoside 2-alpha-L-fucosyltransferase 1 (Fut1)                            | 1    | 10,11    |
| Calcium/calmodulin-dependent protein kinase type II gamma (Camk2g) | 6    | 13,61    | Galactosylgalactosylxylosylprotein 3-beta-glucuronosyltransferase 2 (B3gat2) | 1    | 1,85     |
| 14-3-3 protein gamma (Ywhag)                                       | 6    | 32,39    | Galectin-9 (Lgals9)                                                          | 1    | 4,53     |
| Enhancer of rudimentary homolog (Erh)                              | 5    | 43,27    | Glyceraldehyde-3-phosphate dehydrogenase (Gapdh)                             | 1    | 4,20     |
| Thioredoxin-dependent peroxide reductase (Prdx3)                   | 5    | 29,18    | GRB2-associated-binding protein 2 (Gab2)                                     | 1    | 2,56     |
| Heat shock cognate 71 kDa protein (Hspa8)                          | 5    | 11,15    | Lysozyme C-1 (Lyz1)                                                          | 1    | 8,11     |
| F-actin-capping protein alpha-2 (Capza2)                           | 4    | 20,63    | Matrilin-2 (Matn2)                                                           | 1    | 4,08     |
| Calumenin (Calu)                                                   | 4    | 23,17    | MPN domain-containing protein (Mpnd)                                         | 1    | 2,87     |
| Heat shock factor-binding protein 1 (Hsbp1)                        | 3    | 72,37    | N-acylglucosamine 2-epimerase (Renbp)                                        | 1    | 1,40     |
| Granulins (Grn)                                                    | 3    | 7,13     | Non-lysosomal glucosylceramidase (Gba2)                                      | 1    | 4,25     |
| Reticulocalbin-2 (Rcn2)                                            | 3    | 15,94    | NudC domain-containing protein 2 (Nudcd2)                                    | 1    | 12,74    |
| Elongation factor 1-beta (Eef1b)                                   | 3    | 28,89    | PAX-interacting protein 1 (Paxip1)                                           | 1    | 0,95     |
| 14-3-3 protein epsilon (Ywhae)                                     | 3    | 14,51    | Protein broad-minded (Tbcl3d32)                                              | 1    | 0,62     |
| Hemoglobin beta-1 (Hbb-b1)                                         | 3    | 23,81    | Pyruvate dehydrogenase E1 component subunit beta, mitochondrial (Pdhb)       | 1    | 4,46     |
| Nuclease-sensitive element-binding protein 1 (Ybx1)                | 3    | 17,70    | Rab GTPase-activating protein 1 (Rabgap1)                                    | 1    | 1,79     |
| UPF0568 protein C14orf166 homolog (Cn166)                          | 3    | 15,98    | Rootletin (Crocc)                                                            | 1    | 0,50     |
| Elongation factor 1-delta (Eef1d)                                  | 3    | 17,08    | Serine protease 28 (Prss28)                                                  | 1    | 3,28     |
| Dynein light chain 1, cytoplasmic (Dync1l1)                        | 2    | 37,08    | Signal recognition particle subunit SRP68 (Srp68)                            | 1    | 1,28     |
| Myosin light polypeptide 6 (My16)                                  | 2    | 17,88    | Single-stranded DNA-binding protein, (Ssbp1)                                 | 1    | 9,87     |
| Barrier-to-autointegration factor (Banf1)                          | 2    | 40,45    | Solute carrier family 7 member 13 (Slc7a13)                                  | 1    | 2,72     |
| Dynein light chain 2, cytoplasmic (Dync1l2)                        | 2    | 20,22    | Stimulated by retinoic acid gene 8 (Stra8)                                   | 1    | 4,33     |
| 60S acidic ribosomal protein P2 (Rplp2)                            | 2    | 26,96    | Sushi domain-containing protein 2 (Susd2)                                    | 1    | 5,12     |
| Complement component 1 Q (C1qbp)                                   | 2    | 15,83    | Synaptotagmin-like protein 5 (Sytl5)                                         | 1    | 1,46     |
| Inter-alpha-trypsin inhibitor heavy chain H3 (Itih3)               | 2    | 4,39     | Thrombospondin type-1 domain-containing protein 7B (Thsd7b)                  | 1    | 1,12     |
| Reticulon-4 (Rtn4)                                                 | 2    | 2,47     | Transferrin receptor protein 1 (Tfrc)                                        | 1    | 2,88     |
| Ig kappa chain V-III region PC 2413 (Kv3a5)                        | 1    | 14,41    | Transmembrane protease serine 5 (Tmprss5)                                    | 1    | 3,30     |
| Ataxin-10 (Atxn10)                                                 | 1    | 3,16     | Tripartite motif-containing protein 75 (Trim75)                              | 1    | 2,78     |
| Protein LSM12 homolog (Lsm12)                                      | 1    | 6,67     | Tumor protein D52 (Tpd52)                                                    | 1    | 5,36     |
| Eukaryotic translation initiation factor 3H (Eif3h)                | 1    | 5,40     | Tyrosine-protein kinase JAK1 (Jak1)                                          | 1    | 0,52     |
| Annexin A2 (Anxa2)                                                 | 1    | 2,95     | Unconventional myosin-Ib (Myo1b)                                             | 1    | 2,62     |
| Calmodulin (Calm1)                                                 | 1    | 11,41    | UPF0577 protein KIAA1324 (Kiaa1324)                                          | 1    | 4,16     |
| FAST kinase domain-containing protein 2 (Fastkd2)                  | 1    | 2,76     | UPF0704 protein C6orf165 homolog                                             | 1    | 3,86     |
| Haptoglobin (Hp)                                                   | 1    | 3,17     |                                                                              |      |          |
| Hippocalcin-like protein 1 (Hpcal1)                                | 1    | 10,36    |                                                                              |      |          |
| Ras-related protein Rab-33A (Rab33a)                               | 1    | 8,44     |                                                                              |      |          |
| Ubiquitin-protein ligase E3B (Ube3b)                               | 1    | 0,84     |                                                                              |      |          |

SUPPLEMENTARY TABLE S1

| Protein                                                                      | Total Ppts | Experiment 1 |              | Experiment 2 |              |
|------------------------------------------------------------------------------|------------|--------------|--------------|--------------|--------------|
|                                                                              |            | NCAM2 Ppts   | NCAM2.1 Ppts | NCAM2 Ppts   | NCAM2.1 Ppts |
| Microtubule-associated protein 2 (Map2) *                                    | 24         |              | 4            |              | 22           |
| Neurofilament light polypeptide (Nefl) *                                     | 20         |              | 6            |              | 20           |
| Actin, cytoplasmic 1 (Actb) *                                                | 19         | 1            | 9            | 2            | 17           |
| Neurofilament medium polypeptide (Nefm) *                                    | 19         |              | 3            |              | 19           |
| Tubulin beta-4A (Tubb4a)                                                     | 18         |              |              |              | 18           |
| Alpha-internexin (Ina) *                                                     | 17         |              | 1            |              | 17           |
| Tubulin alpha-1A (Tuba1a) *                                                  | 13         |              | 3            | 1            | 13           |
| Tubulin alpha-1C (Tuba1c)                                                    | 12         |              | 3            | 1            |              |
| Actin, alpha cardiac muscle 1 (Actc1) *                                      | 11         | 1            | 5            |              | 10           |
| Calcium/calmodulin-dependent protein kinase type II beta (Camk2b)            | 11         |              |              |              | 11           |
| Calcium/calmodulin-dependent protein kinase type II alpha (Camk2a) *         | 10         |              | 1            |              | 10           |
| Microtubule-associated protein 1B (Map1b)                                    | 9          |              |              |              | 9            |
| Beta-actin-like protein 2 (Actbl2)                                           | 8          |              |              |              | 7            |
| F-actin-capping protein beta (Capzb)                                         | 8          |              |              |              | 8            |
| 14-3-3 protein zeta/delta (Ywhaz)                                            | 8          |              |              | 1            | 8            |
| Tubulin beta-6 chain (Tubb6)                                                 | 7          | 1            |              |              |              |
| Calcium/calmodulin-dependent protein kinase type II delta (Camk2d)           | 6          |              |              |              | 6            |
| Calcium/calmodulin-dependent protein kinase type II gamma (Camk2g)           | 6          |              |              |              | 6            |
| 14-3-3 protein gamma (Ywhag)                                                 | 6          |              |              | 1            | 6            |
| Enhancer of rudimentary homolog (Erh) *                                      | 5          |              | 2            |              | 5            |
| Thioredoxin-dependent peroxide reductase (Prdx3) *                           | 5          |              | 3            |              | 4            |
| Heat shock cognate 71 kDa protein (Hspa8) *                                  | 5          | 1            | 4            | 1            | 2            |
| F-actin-capping protein alpha-2 (Capza2)                                     | 4          |              |              |              | 4            |
| Calumenin (Calu) *                                                           | 4          |              | 1            |              | 3            |
| Heat shock factor-binding protein 1 (Hsbp1) *                                | 3          | 1            |              | 3            | 3            |
| Granulins (Grn) *                                                            | 3          | 3            | 2            | 3            | 1            |
| Reticulocalbin-2 (Rcn2)                                                      | 3          |              |              | 3            | 2            |
| Elongation factor 1-beta (Eef1b) *                                           | 3          |              | 2            |              | 3            |
| 14-3-3 protein epsilon (Ywhae)                                               | 3          |              |              | 1            | 3            |
| Hemoglobin beta-1 (Hbb-b1)                                                   | 3          |              |              |              | 3            |
| Nuclease-sensitive element-binding protein 1 (Ybx1)                          | 3          |              |              |              | 3            |
| UPF0568 protein C14orf166 homolog (Cn166)                                    | 3          |              |              |              | 3            |
| Elongation factor 1-delta (Eef1d) *                                          | 3          |              | 1            |              | 2            |
| Dynein light chain 1, cytoplasmic (Dylnl1) *                                 | 2          |              | 1            | 1            | 2            |
| Myosin light polypeptide 6 (Myl6)                                            | 2          |              |              |              | 2            |
| Barrier-to-autointegration factor (Banf1)                                    | 2          |              |              |              | 2            |
| Dynein light chain 2, cytoplasmic (Dylnl2)                                   | 2          |              | 2            | 1            |              |
| 60S acidic ribosomal protein P2 (Rplp2) *                                    | 2          |              | 1            |              | 2            |
| Complement component 1 Q subcomponent-binding protein, mitochondrial (C1qbp) | 2          |              | 2            |              |              |
| Inter-alpha-trypsin inhibitor heavy chain H3 (Itih3)                         | 2          |              |              |              | 2            |
| Reticulon-4 (Rtn4)                                                           | 2          |              |              |              | 2            |
| Ig kappa chain V-III region PC 2413 (Kv3a5)                                  | 1          |              |              | 1            |              |
| Ataxin-10 (Atxn10) *                                                         | 1          |              | 1            |              | 1            |
| Protein LSM12 homolog (Lsm12) *                                              | 1          |              | 1            |              | 1            |
| Eukaryotic translation initiation factor 3 subunit H (Eif3h)                 | 1          |              |              |              | 1            |
| Annexin A2 (Anxa2)                                                           | 1          | 1            | 1            |              |              |
| Calmodulin (Calm1)                                                           | 1          | 1            |              |              | 1            |
| FAST kinase domain-containing protein 2 (Fastkd2)                            | 1          |              |              |              | 1            |
| Haptoglobin (Hp)                                                             | 1          |              |              |              | 1            |
| Hippocalcin-like protein 1 (Hpcal1)                                          | 1          |              |              | 1            | 1            |
| Ras-related protein Rab-33A (Rab33a)                                         | 1          |              |              | 1            | 1            |
| Ubiquitin-protein ligase E3B (Ube3b)                                         | 1          |              |              |              | 1            |

SUPPLEMENTARY TABLE S2
